# Supplementary material for: Transcriptional defects and reprogramming barriers in somatic cell nuclear reprogramming as revealed by single-embryo RNA sequencing
Source: PubMed Central journal article supplement (PMC6180508; doi:10.1186/s12864-018-5091-1), 2018-10-10
Supplement: 12864_2018_5091_MOESM1_ESM.pdf [file 12864_2018_5091_MOESM1_ESM.pdf]

FPKM Distribution

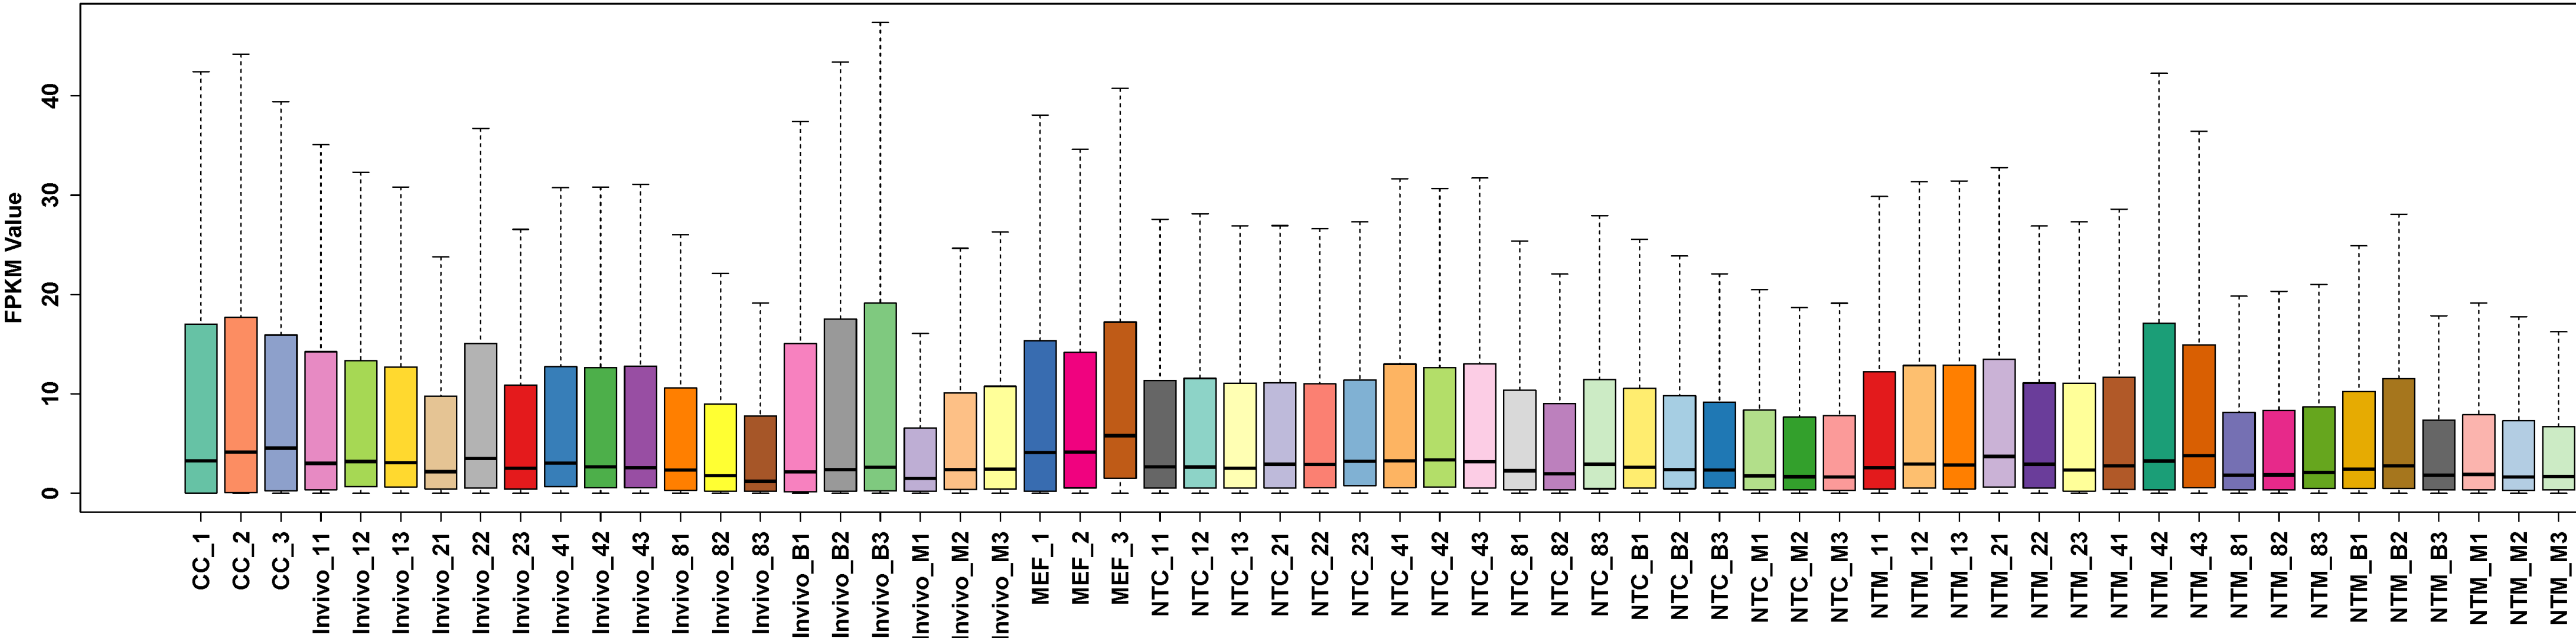

Figure S1 The gene expression of each sample. Related to Figure 1. CC\_1 means the first sample of CC group, CC\_2 means the second sample of CC group. Invivo\_11 means the first sample of Invivo\_1 group, Invivo\_12 means the second sample of Invivo\_1 group. Invivo\_21 means the first sample of Invivo\_2 group, Invivo\_22 means the second sample of Invivo\_2 group. The rest can be done in the same manner.
