# Supplementary material for: Transcriptional defects and reprogramming barriers in somatic cell nuclear reprogramming as revealed by single-embryo RNA sequencing
Source: PubMed Central journal article supplement (PMC6180508; doi:10.1186/s12864-018-5091-1), 2018-10-10
Supplement: 12864_2018_5091_MOESM9_ESM.pdf [file 12864_2018_5091_MOESM9_ESM.pdf]

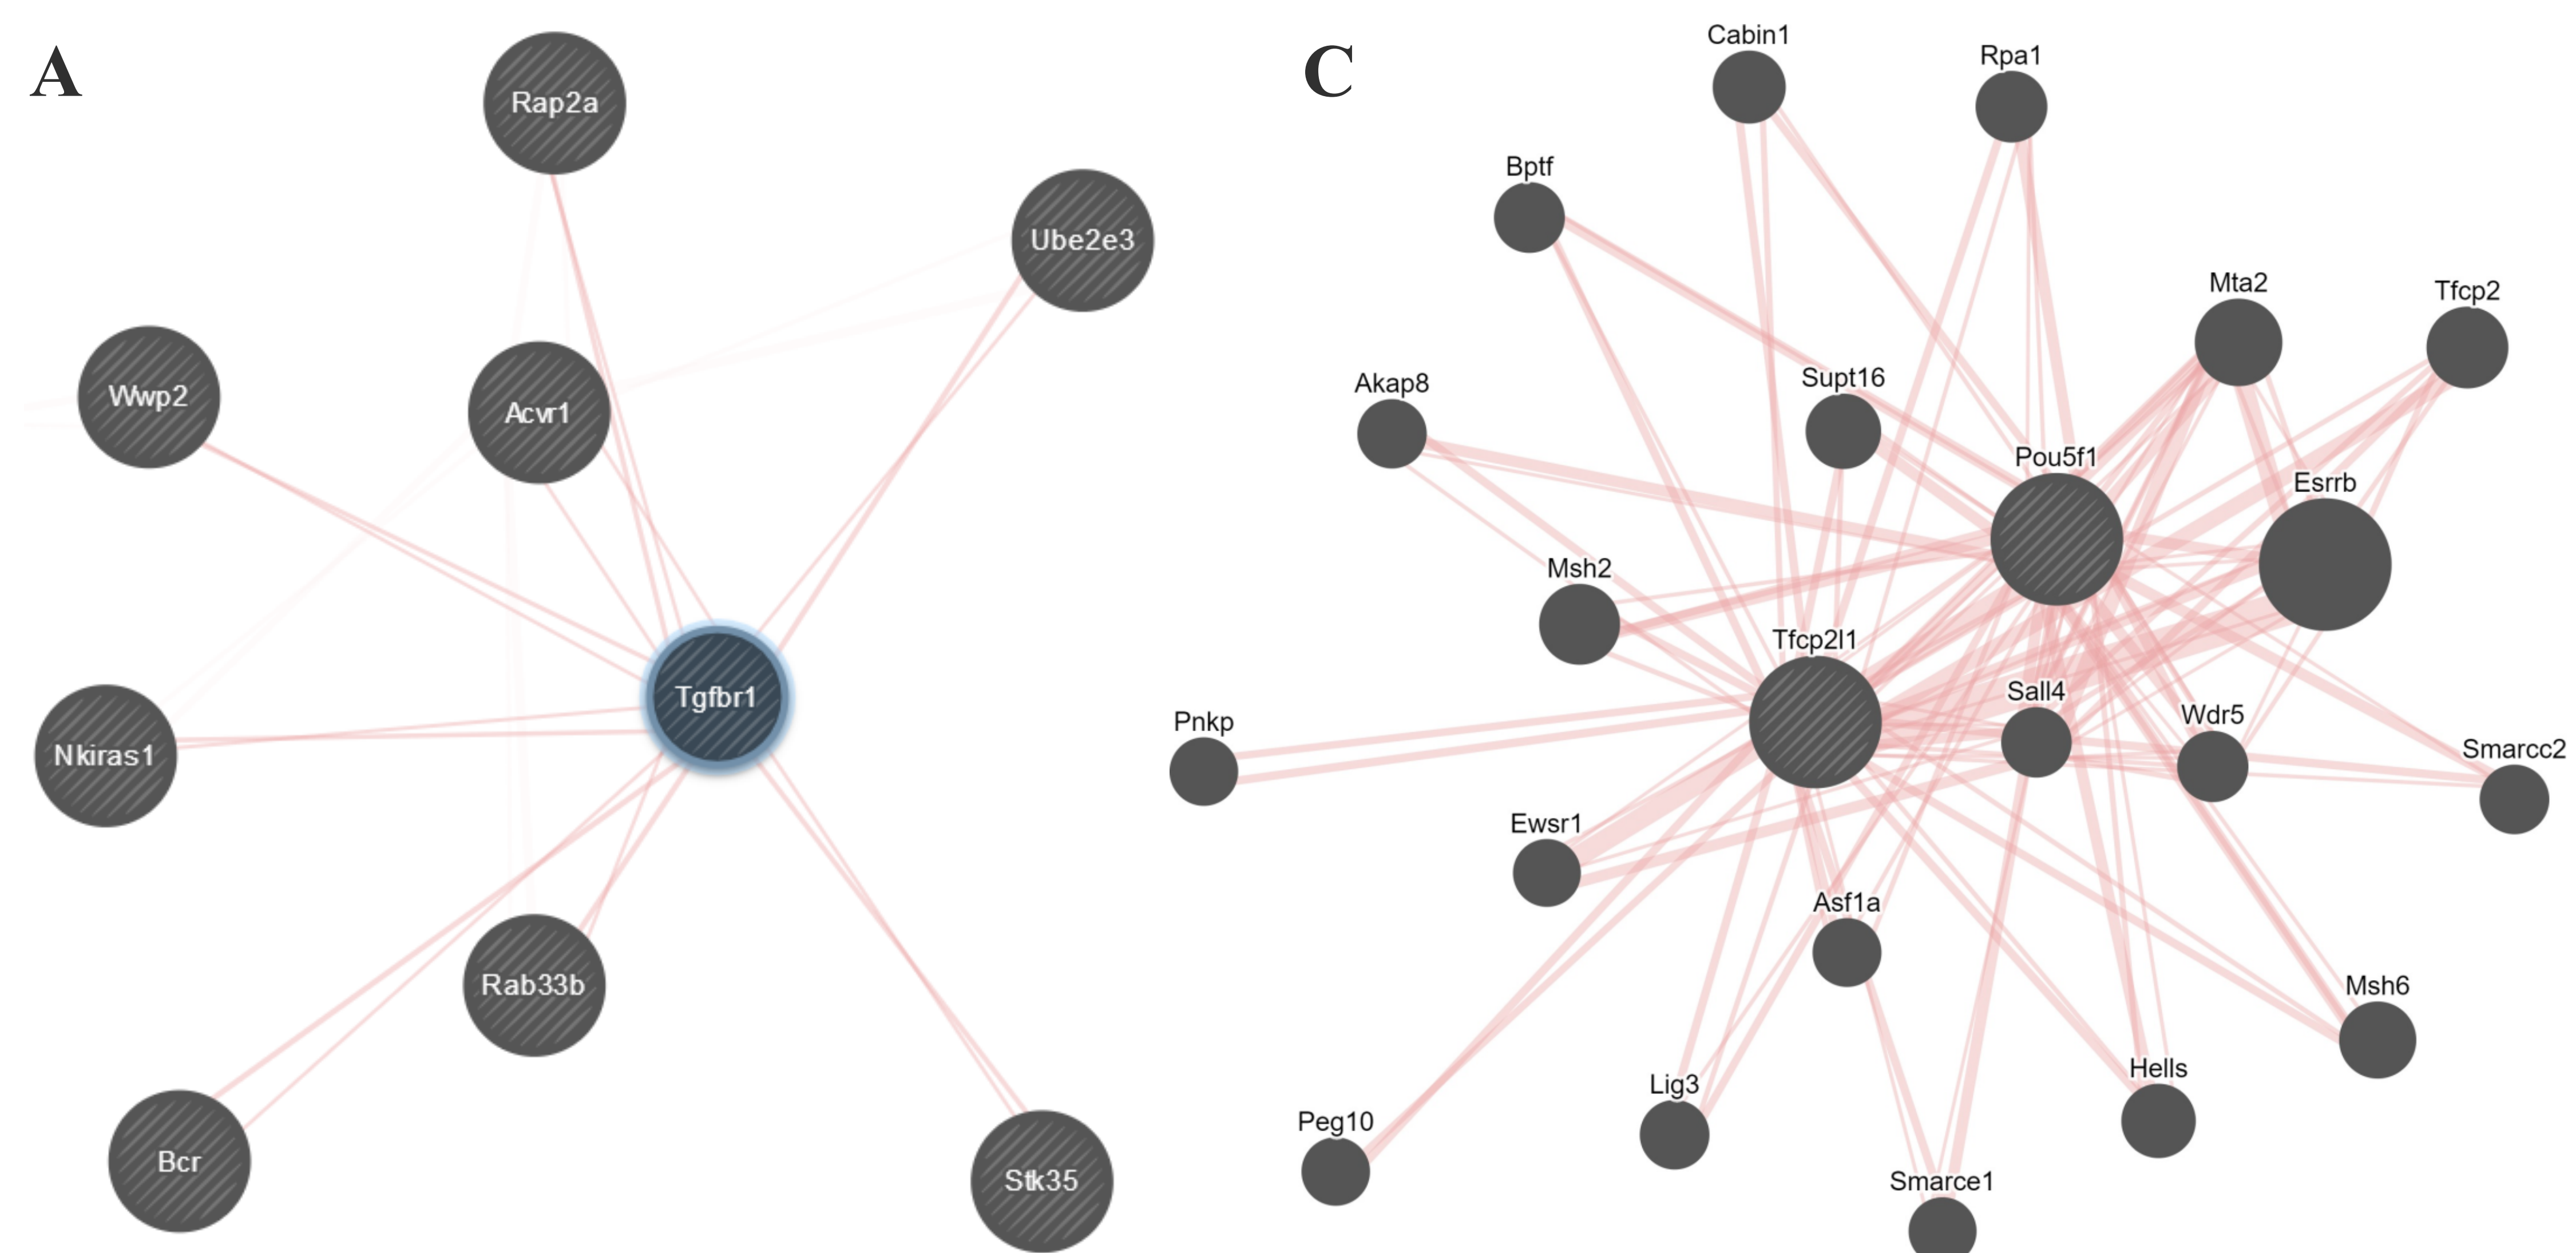

**B**

| Sublist                  | Category | Term                                                                  | RT                 | Genes                                                                  | Count | %   | P-Value | Benjamini |
|--------------------------|----------|-----------------------------------------------------------------------|--------------------|------------------------------------------------------------------------|-------|-----|---------|-----------|
| <input type="checkbox"/> | INTACT   | 81879:transcription factor CP2-like 1(Tfcp2l1)                        | <a href="#">RT</a> | <div style="width: 100%; height: 10px; background-color: blue;"></div> | 18    | 7.3 | 8.8E-12 | 2.4E-9    |
| <input type="checkbox"/> | INTACT   | 217031:transcriptional adaptor 2A(Tada2a)                             | <a href="#">RT</a> | <div style="width: 25%; height: 10px; background-color: blue;"></div>  | 8     | 3.2 | 4.3E-7  | 5.9E-5    |
| <input type="checkbox"/> | INTACT   | 14534:K(lysine) acetyltransferase 2A(Kat2a)                           | <a href="#">RT</a> | <div style="width: 25%; height: 10px; background-color: blue;"></div>  | 8     | 3.2 | 1.6E-5  | 1.4E-3    |
| <input type="checkbox"/> | INTACT   | 18999:POU domain, class 5, transcription factor 1(Pou5f1)             | <a href="#">RT</a> | <div style="width: 25%; height: 10px; background-color: blue;"></div>  | 9     | 3.6 | 2.1E-3  | 1.3E-1    |
| <input type="checkbox"/> | INTACT   | 66233:DNA methyltransferase 1-associated protein 1(Dmap1)             | <a href="#">RT</a> | <div style="width: 25%; height: 10px; background-color: blue;"></div>  | 4     | 1.6 | 2.7E-3  | 1.4E-1    |
| <input type="checkbox"/> | INTACT   | 17187:Max protein(Max)                                                | <a href="#">RT</a> | <div style="width: 25%; height: 10px; background-color: blue;"></div>  | 4     | 1.6 | 3.6E-3  | 1.5E-1    |
| <input type="checkbox"/> | INTACT   | 107951:cyclin-dependent kinase 9 (CDC2-related kinase)(Cdk9)          | <a href="#">RT</a> | <div style="width: 25%; height: 10px; background-color: blue;"></div>  | 7     | 2.8 | 4.6E-3  | 1.6E-1    |
| <input type="checkbox"/> | INTACT   | 19045:protein phosphatase 1, catalytic subunit, alpha isoform(Ppp1ca) | <a href="#">RT</a> | <div style="width: 25%; height: 10px; background-color: blue;"></div>  | 4     | 1.6 | 9.0E-3  | 2.7E-1    |
| <input type="checkbox"/> | INTACT   | 19821:ring finger protein 2(Rnf2)                                     | <a href="#">RT</a> | <div style="width: 25%; height: 10px; background-color: blue;"></div>  | 5     | 2.0 | 9.1E-3  | 2.4E-1    |

Figure S4 Interaction analysis of specific proteins. Related to Figure 5.

(A) Tgfbr1 physically interact with 8 genes according to the analysis with DAVID Bioinformatics Resources 6.8.

(B) The protein interactions with these genes were analyzed with DAVID Bioinformatics Resources 6.8.

(C) 113 relationships were observed among Tfc211, Oct4 and 20 related genes according to the analysis with DAVID Bioinformatics Resources 6.8.
